# Supplementary material for: Linkages between health systems and communities for chronic care: a scoping review protocol
Source: HighWire-hosted journal article supplement (doi:10.1136/bmjopen-2021-060430), 2022-08-01
Supplement: bmjopen-2021-060430supp001_data_supplement.pdf [file bmjopen-2021-060430supp001_data_supplement.pdf]

## Supplementary Material – Search Strategies

Database: Ovid MEDLINE(R) ALL <1946 to March 31, 2022>

Search Strategy:

- 
- 1 Continuity of Patient Care/ (20305)
  - 2 Intersectoral collaboration/ (2560)
  - 3 Delivery of Health Care, Integrated/ (13871)
  - 4 ((integrat\* or coordinat\* or co-ordinat\* or collaborat\* or multidisciplinary or interdisciplinary) adj2 (care or service\* or treatment or healthcare or model)).tw,kf. (71862)
  - 5 (Interprofessional or Inter-professional or Intersectoral or Interdisciplinary or Integrated care system or Interagency or Cross border cooperation or Cross border co-operation or Coordination across boundaries or Co-ordination across boundaries or Multidisciplinary or Multiprofessional or Multiagency or Multisector or Linkage\*).tw,kf. (300572)
  - 6 Chronic Care Model.tw,kf. (951)
  - 7 Health Services/ (26541)
  - 8 Primary Health Care/ (87186)
  - 9 (primary health care or primary care).tw,kf. (155580)
  - 10 Learning Health System/ (171)
  - 11 health services.tw,kf. (96984)
  - 12 (health system or healthcare system or health care system).tw,kf. (102023)
  - 13 Community Participation/ (18115)
  - 14 Organizations, Nonprofit/ (3432)
  - 15 Community Networks/ (7163)
  - 16 Community Health Services/ (32756)
  - 17 Community-Institutional Relations/ (10918)
  - 18 Health Promotion/ (78972)
  - 19 Public Health/ (90051)
  - 20 (Organization\* adj2 partner\*).tw,kf. (907)
  - 21 community.tw,kf. (570972)
  - 22 non-profit.tw,kf. (2616)
  - 23 health promotion.tw,kf. (38104)
  - 24 public health.tw,kf. (326017)
  - 25 (clinical-community or community-clinical).tw,kf. (1236)
  - 26 exp Chronic Disease/ (516954)

- 27 ((Condition\* or Disease\* or Disorder\* or illness\* or syndrome\*) and (Chronic or Complex Chronic or Long-term or Long term or Co-morbid\* or Co morbid or comorbid or Multi-morbid\* or multimorbid or multi morbid\*)).tw,kf. (1103474)
- 28 1 or 2 or 3 or 4 or 5 or 6 (377309)
- 29 13 or 14 or 15 or 16 or 17 or 18 or 19 or 20 or 21 or 22 or 23 or 24 or 25 (999199)
- 30 26 or 27 (1400118)
- 31 7 or 8 or 9 or 10 or 11 or 12 (365109)
- 32 28 and 29 and 30 and 31 (1776)
- 33 limit 32 to yr="2001 -Current" (1679)

.....

Database: Embase <1996 to 2022 Week 12>

Search Strategy:

- 
- 1 intersectoral collaboration/ (3156)
- 2 ((integrat\* or coordinat\* or co-ordinat\* or collaborat\* or multidisciplinary or interdisciplinary) adj2 (care or service\* or treatment or healthcare or model)).tw,kw. (93790)
- 3 (Interprofessional or Intersectoral or Interdisciplinary or Integrated care system or Interagency or Cross border cooperation or Cross border co-operation or Coordination across boundaries or Co-ordination across boundaries or Multidisciplinary or Multiprofessional or Multiagency or Multisector or Linkage).tw,kw. (338720)
- 4 integrated health care system/ (12220)
- 5 Chronic Care Model.tw,kw. (1217)
- 6 learning health system/ (336)
- 7 primary health care/ (59210)
- 8 (primary health care or primary care).tw,kw. (188885)
- 9 (health system or healthcare system or health care system).tw,kw. (133582)
- 10 community/ (81969)
- 11 community care/ or community integration/ or community program/ (52273)
- 12 non profit organization/ (32706)
- 13 public health/ (184672)
- 14 health promotion/ (93971)
- 15 (Organization\* adj2 partner\*).tw,kw. (1186)
- 16 community.tw,kw. (634505)
- 17 non-profit.tw,kw. (4005)

- 18 health promotion.tw,kw. (40616)
- 19 public health.tw,kw. (321971)
- 20 (clinical-community or community-clinical).tw,kw. (1615)
- 21 exp chronic disease/ (158835)
- 22 ((Condition\* or Disease\* or Disorder\* or illness\* or syndrome\*) and (Chronic or Complex Chronic or Long-term or Long term or Co-morbid\* or Co morbid or comorbid or Multi-morbid\* or multimorbid or multi morbid\*)).tw,kw. (1474845)
- 23 1 or 2 or 3 or 4 or 5 (410901)
- 24 10 or 11 or 12 or 13 or 14 or 15 or 16 or 17 or 18 or 19 or 20 (1131181)
- 25 21 or 22 (1536649)
- 26 6 or 7 or 8 or 9 (330451)
- 27 23 and 24 and 25 and 26 (2082)
- 28 limit 27 to yr="2001 - 2023" (2040)

.....

Database: APA PsycInfo <1987 to March Week 4 2022>

Search Strategy:

- 
- 1 "Continuum of Care"/ (2058)
  - 2 ((integrat\* or coordinat\* or co-ordinat\* or collaborat\* or multidisciplinary or interdisciplinary) adj2 (care or service\* or treatment or healthcare or model)).tw. (32881)
  - 3 (Interprofessional or Inter-professional or Intersectoral or Interdisciplinary or Integrated care system or Interagency or Cross border cooperation or Cross border co-operation or Coordination across boundaries or Co-ordination across boundaries or Multidisciplinary or Multiprofessional or Multiagency or Multisector or Linkage).tw. (61773)
  - 4 integrated services/ (4560)
  - 5 Health Care Services/ or Primary Health Care/ or Health Care Delivery/ (79463)
  - 6 Learning Health System.tw. (23)
  - 7 health services.tw. (43545)
  - 8 (health system or healthcare system or health care system).tw. (21096)
  - 9 community services/ or public health services/ or community facilities/ or community involvement/ (24008)
  - 10 community health/ (3899)
  - 11 Health Promotion/ (26869)
  - 12 (Organization\* adj2 partner\*).tw. (614)
  - 13 community.tw. (259173)
  - 14 non-profit.tw. (2409)

- 15 health promotion.tw. (21430)  
 16 public health.tw. (56364)  
 17 (clinical-community or community-clinical).tw. (528)  
 18 exp "Chronicity (Disorders)"/ or exp Chronic Illness/ (34785)  
 19 ((Condition\* or Disease\* or Disorder\* or illness\* or syndrome\*) and (Chronic or Complex Chronic or Long-term or Long term or Co-morbid\* or Co morbid or comorbid or Multi-morbid\* or multimorbid or multi morbid\*)).tw. (166175)  
 20 1 or 2 or 3 or 4 (91452)  
 21 5 or 6 or 7 or 8 (125743)  
 22 9 or 10 or 11 or 12 or 13 or 14 or 15 or 16 or 17 (335172)  
 23 18 or 19 (178611)  
 24 20 and 21 and 22 and 23 (546)  
 25 limit 24 to yr="2001 -Current" (504)

\*\*\*\*\*

Database: CINAHL

| #   | Query                                                         | Limiters/Expanders                                                                                                                          | Last Run Via                                                                                                   | Results |
|-----|---------------------------------------------------------------|---------------------------------------------------------------------------------------------------------------------------------------------|----------------------------------------------------------------------------------------------------------------|---------|
| S28 | S23 AND S24 AND S25 AND S26                                   | Limiters - Published Date: 20010101-20221231<br>Expanders - Apply related words; Apply equivalent subjects<br>Search modes - Boolean/Phrase | Interface - EBSCOhost Research Databases Search Screen - Advanced Search Database - CINAHL Plus with Full Text | 1,238   |
| S27 | S23 AND S24 AND S25 AND S26                                   | Expanders - Apply related words; Apply equivalent subjects<br>Search modes - Boolean/Phrase                                                 | Interface - EBSCOhost Research Databases Search Screen - Advanced Search Database - CINAHL Plus with Full Text | 1,267   |
| S26 | S21 OR S22                                                    | Expanders - Apply related words; Apply equivalent subjects<br>Search modes - Boolean/Phrase                                                 | Interface - EBSCOhost Research Databases Search Screen - Advanced Search Database - CINAHL Plus with Full Text | 323,161 |
| S25 | (S11 OR S12 OR S13 OR S14 OR S15 OR S16 OR S18 OR S19 OR S20) | Expanders - Apply related words; Apply equivalent subjects                                                                                  | Interface - EBSCOhost Research Databases Search Screen -                                                       | 446,955 |

|     |                                                                                                                                                                                                                                                                                                                                                                                                                                                  |                                                                                             |                                                                                                                |         |
|-----|--------------------------------------------------------------------------------------------------------------------------------------------------------------------------------------------------------------------------------------------------------------------------------------------------------------------------------------------------------------------------------------------------------------------------------------------------|---------------------------------------------------------------------------------------------|----------------------------------------------------------------------------------------------------------------|---------|
|     |                                                                                                                                                                                                                                                                                                                                                                                                                                                  | Search modes - Boolean/Phrase                                                               | Advanced Search Database - CINAHL Plus with Full Text                                                          |         |
| S24 | S7 OR S8 OR S9 OR S10                                                                                                                                                                                                                                                                                                                                                                                                                            | Expanders - Apply related words; Apply equivalent subjects<br>Search modes - Boolean/Phrase | Interface - EBSCOhost Research Databases Search Screen - Advanced Search Database - CINAHL Plus with Full Text | 198,772 |
| S23 | S1 OR S2 OR S3 OR S4 OR S5 OR S6                                                                                                                                                                                                                                                                                                                                                                                                                 | Expanders - Apply related words; Apply equivalent subjects<br>Search modes - Boolean/Phrase | Interface - EBSCOhost Research Databases Search Screen - Advanced Search Database - CINAHL Plus with Full Text | 164,620 |
| S22 | TI ( (Condition* or Disease* or Disorder* or illness* or syndrome*) and (Chronic or Complex Chronic or Long-term or Long term or Co-morbid*or Co morbid or comorbid or Multimorbid* or multimorbid or multimorbid*)) ) OR AB ( (Condition* or Disease* or Disorder* or illness* or syndrome*) and (Chronic or Complex Chronic or Long-term or Long term or Co-morbid*or Co morbid or comorbid or Multimorbid* or multimorbid or multimorbid*)) ) | Expanders - Apply related words; Apply equivalent subjects<br>Search modes - Boolean/Phrase | Interface - EBSCOhost Research Databases Search Screen - Advanced Search Database - CINAHL Plus with Full Text | 284,774 |
| S21 | (MH "Chronic Disease+")                                                                                                                                                                                                                                                                                                                                                                                                                          | Expanders - Apply related words; Apply equivalent subjects<br>Search modes - Boolean/Phrase | Interface - EBSCOhost Research Databases Search Screen - Advanced Search Database - CINAHL Plus with Full Text | 70,628  |
| S20 | TI (clinical-community or community-clinical) OR AB (clinical-community or community-clinical)                                                                                                                                                                                                                                                                                                                                                   | Expanders - Apply related words; Apply equivalent subjects<br>Search modes - Boolean/Phrase | Interface - EBSCOhost Research Databases Search Screen - Advanced Search Database - CINAHL Plus with Full Text | 697     |
| S19 | TI ( nonprofit or not for profit ) OR AB ( nonprofit or not for profit )                                                                                                                                                                                                                                                                                                                                                                         | Expanders - Apply related words; Apply equivalent subjects<br>Search modes - Boolean/Phrase | Interface - EBSCOhost Research Databases Search Screen - Advanced Search Database - CINAHL Plus with Full Text | 8,122   |

|     |                                                                                      |                                                                                             |                                                                                                                |         |
|-----|--------------------------------------------------------------------------------------|---------------------------------------------------------------------------------------------|----------------------------------------------------------------------------------------------------------------|---------|
| S18 | TI ( public health or health promotion ) OR AB ( public health or health promotion ) | Expanders - Apply related words; Apply equivalent subjects<br>Search modes - Boolean/Phrase | Interface - EBSCOhost Research Databases Search Screen - Advanced Search Database - CINAHL Plus with Full Text | 132,258 |
| S17 | (MH "Health Promotion")                                                              | Expanders - Apply related words; Apply equivalent subjects<br>Search modes - Boolean/Phrase | Interface - EBSCOhost Research Databases Search Screen - Advanced Search Database - CINAHL Plus with Full Text | 73,047  |
| S16 | (MH "Public Health")                                                                 | Expanders - Apply related words; Apply equivalent subjects<br>Search modes - Boolean/Phrase | Interface - EBSCOhost Research Databases Search Screen - Advanced Search Database - CINAHL Plus with Full Text | 56,744  |
| S15 | (MH "Organizations, Nonprofit")                                                      | Expanders - Apply related words; Apply equivalent subjects<br>Search modes - Boolean/Phrase | Interface - EBSCOhost Research Databases Search Screen - Advanced Search Database - CINAHL Plus with Full Text | 10,462  |
| S14 | TI Organization* N2 partner* OR AB Organization* N2 partner*                         | Expanders - Apply related words; Apply equivalent subjects<br>Search modes - Boolean/Phrase | Interface - EBSCOhost Research Databases Search Screen - Advanced Search Database - CINAHL Plus with Full Text | 1,135   |
| S13 | TI community OR AB community                                                         | Expanders - Apply related words; Apply equivalent subjects<br>Search modes - Boolean/Phrase | Interface - EBSCOhost Research Databases Search Screen - Advanced Search Database - CINAHL Plus with Full Text | 285,479 |
| S12 | (MH "Community Health Services")                                                     | Expanders - Apply related words; Apply equivalent subjects<br>Search modes - Boolean/Phrase | Interface - EBSCOhost Research Databases Search Screen - Advanced Search Database - CINAHL Plus with Full Text | 24,401  |
| S11 | (MH "Community-Institutional Relations") OR (MH "Community Networks")                | Expanders - Apply related words; Apply equivalent subjects<br>Search modes - Boolean/Phrase | Interface - EBSCOhost Research Databases Search Screen - Advanced Search Database - CINAHL Plus with Full Text | 6,905   |

|     |                                                                                                                                                                                                                                                                                                                                                                                                                                                                                                                                                                                                                                                                      |                                                                                             |                                                                                                                |        |
|-----|----------------------------------------------------------------------------------------------------------------------------------------------------------------------------------------------------------------------------------------------------------------------------------------------------------------------------------------------------------------------------------------------------------------------------------------------------------------------------------------------------------------------------------------------------------------------------------------------------------------------------------------------------------------------|---------------------------------------------------------------------------------------------|----------------------------------------------------------------------------------------------------------------|--------|
| S10 | TI ( health system or healthcare system or health care system )<br>OR AB ( health system or healthcare system or health care system )                                                                                                                                                                                                                                                                                                                                                                                                                                                                                                                                | Expanders - Apply related words; Apply equivalent subjects<br>Search modes - Boolean/Phrase | Interface - EBSCOhost Research Databases Search Screen - Advanced Search Database - CINAHL Plus with Full Text | 74,925 |
| S9  | TI ( primary health care or primary care ) OR AB ( primary health care or primary care )                                                                                                                                                                                                                                                                                                                                                                                                                                                                                                                                                                             | Expanders - Apply related words; Apply equivalent subjects<br>Search modes - Boolean/Phrase | Interface - EBSCOhost Research Databases Search Screen - Advanced Search Database - CINAHL Plus with Full Text | 92,785 |
| S8  | (MH "Health Services")                                                                                                                                                                                                                                                                                                                                                                                                                                                                                                                                                                                                                                               | Expanders - Apply related words; Apply equivalent subjects<br>Search modes - Boolean/Phrase | Interface - EBSCOhost Research Databases Search Screen - Advanced Search Database - CINAHL Plus with Full Text | 14,943 |
| S7  | (MH "Learning Health System")<br>OR (MH "Primary Health Care")                                                                                                                                                                                                                                                                                                                                                                                                                                                                                                                                                                                                       | Expanders - Apply related words; Apply equivalent subjects<br>Search modes - Boolean/Phrase | Interface - EBSCOhost Research Databases Search Screen - Advanced Search Database - CINAHL Plus with Full Text | 70,396 |
| S6  | TI Chronic care model OR AB chronic care model                                                                                                                                                                                                                                                                                                                                                                                                                                                                                                                                                                                                                       | Expanders - Apply related words; Apply equivalent subjects<br>Search modes - Boolean/Phrase | Interface - EBSCOhost Research Databases Search Screen - Advanced Search Database - CINAHL Plus with Full Text | 695    |
| S5  | TI ( Interprofessional or Inter-professional or Intersectoral or Interdisciplinary or Integrated care system or Interagency or Cross border cooperation or cross border co-operation or coordination across boundaries or co-ordination across boundaries or multidisciplinary or multiprofessional or multiagency or multisector or linkage ) OR AB ( Interprofessional or Inter-professional or Intersectoral or Interdisciplinary or Integrated care system or Interagency or Cross border cooperation or cross border co-operation or coordination across boundaries or co-ordination across boundaries or multidisciplinary or multiprofessional or multiagency | Expanders - Apply related words; Apply equivalent subjects<br>Search modes - Boolean/Phrase | Interface - EBSCOhost Research Databases Search Screen - Advanced Search Database - CINAHL Plus with Full Text | 89,075 |

|    |                                                                                                                                                                                                                                                                                                                                      |                                                                                             |                                                                                                                |        |
|----|--------------------------------------------------------------------------------------------------------------------------------------------------------------------------------------------------------------------------------------------------------------------------------------------------------------------------------------|---------------------------------------------------------------------------------------------|----------------------------------------------------------------------------------------------------------------|--------|
|    | or multisector or linkage )                                                                                                                                                                                                                                                                                                          |                                                                                             |                                                                                                                |        |
| S4 | TI ( integrat* or coordinat* or co-ordinat* or collaborat* or multidisciplinary or interdisciplinary) N2 (care or service* or treatment or healthcare or model ) OR AB ( integrat* or coordinat* or co-ordinat* or collaborat* or multidisciplinary or interdisciplinary) N2 (care or service* or treatment or healthcare or model ) | Expanders - Apply related words; Apply equivalent subjects<br>Search modes - Boolean/Phrase | Interface - EBSCOhost Research Databases Search Screen - Advanced Search Database - CINAHL Plus with Full Text | 47,480 |
| S3 | (MH "Health Care Delivery, Integrated")                                                                                                                                                                                                                                                                                              | Expanders - Apply related words; Apply equivalent subjects<br>Search modes - Boolean/Phrase | Interface - EBSCOhost Research Databases Search Screen - Advanced Search Database - CINAHL Plus with Full Text | 13,449 |
| S2 | (MH "Interprofessional Relations")                                                                                                                                                                                                                                                                                                   | Expanders - Apply related words; Apply equivalent subjects<br>Search modes - Boolean/Phrase | Interface - EBSCOhost Research Databases Search Screen - Advanced Search Database - CINAHL Plus with Full Text | 28,614 |
| S1 | (MH "Continuity of Patient Care")                                                                                                                                                                                                                                                                                                    | Expanders - Apply related words; Apply equivalent subjects<br>Search modes - Boolean/Phrase | Interface - EBSCOhost Research Databases Search Screen - Advanced Search Database - CINAHL Plus with Full Text | 16,120 |

### Grey Literature Search & Documentation Strategies

Strategy 1. Search Engine Searching

Procedure for selecting potentially relevant records for screening: review first 10 pages of search results or 100 results per search.

Search engine: Google

Date searched: 04-01-2022

| # | Search                                                             | # Results retrieved* | # Results reviewed | # Records selected for screening** |
|---|--------------------------------------------------------------------|----------------------|--------------------|------------------------------------|
| 1 | Community-clinical linkage AND (guideline OR strategy OR report OR | ~59,100,000          | 100                |                                    |



|          |                                                                                                                                                                                 |               |     |
|----------|---------------------------------------------------------------------------------------------------------------------------------------------------------------------------------|---------------|-----|
|          | example)                                                                                                                                                                        |               |     |
| <b>2</b> | Chronic care model AND (community resource OR organization) AND (guideline OR strategy OR report OR example)                                                                    | ~ 149,000,000 | 100 |
| <b>3</b> | Chronic disease management AND (community resource OR organization) AND (guideline OR strategy OR report OR example)                                                            | ~ 206,000,000 | 100 |
| <b>4</b> | Chronic disease management AND community organization AND (partnership or linkage) AND (health system OR health service OR clinical)                                            | ~122,000,000  | 100 |
| <b>5</b> | (Chronic care OR chronic disease management) AND (community resource OR organization) AND (health system OR clinical) AND (integrated OR connected OR coordinated OR continued) | ~507,000,000  | 100 |

\*as reported by search engine

\*\*to be completed following screening

Search Engine: Microsoft Bing

Date searched: 04-01-2022

| #        | Search                                                                                                       | # Results retrieved* | # Results reviewed | # Records selected for screening** |
|----------|--------------------------------------------------------------------------------------------------------------|----------------------|--------------------|------------------------------------|
| <b>1</b> | Community-clinical linkage AND (guideline OR strategy OR report OR example)                                  | 55,800               | 100                |                                    |
| <b>2</b> | Chronic care model AND (community resource OR organization) AND (guideline OR strategy OR report OR example) | 10,100,000           | 100                |                                    |
| <b>3</b> | Chronic disease management AND (community resource OR organization) AND (guideline OR strategy OR report     | 9,330,000            | 100                |                                    |

OR example)

|   |                                                                                                                                                                                 |         |     |
|---|---------------------------------------------------------------------------------------------------------------------------------------------------------------------------------|---------|-----|
| 4 | Chronic disease management AND community organization AND (partnership or linkage) AND (health system OR health service OR clinical)                                            | 26,500  | 100 |
| 5 | (Chronic care OR chronic disease management) AND (community resource OR organization) AND (health system OR clinical) AND (integrated OR connected OR coordinated OR continued) | 220,000 | 100 |

\*as reported by search engine

\*\*to be completed following screening

#### Strategy 2: Targeted Website Search

Procedure: browse/search websites of organizations (health care organizations, NGOs, governments, research collectives) that publish documents relevant to the research question, to identify potentially relevant documents for screening. Target websites identified through previous search engine search, preliminary literature review of content area and content experts.

#### Website Browsing Documentation:

| #  | Organization Name                                            | Website                                                                                           |
|----|--------------------------------------------------------------|---------------------------------------------------------------------------------------------------|
| 1  | Social Prescribing Network                                   | <a href="https://www.socialprescribingnetwork.com/">https://www.socialprescribingnetwork.com/</a> |
| 2  | Kings Fund UK                                                | <a href="https://www.kingsfund.org.uk/">https://www.kingsfund.org.uk/</a>                         |
| 3  | Alliance for Healthier Communities                           | <a href="https://www.allianceon.org/">https://www.allianceon.org/</a>                             |
| 4  | Black Health Alliance                                        | <a href="https://blackhealthalliance.ca/">https://blackhealthalliance.ca/</a>                     |
| 5  | National Collaborating Centre for Determinants of Health     | <a href="https://nccdh.ca/">https://nccdh.ca/</a>                                                 |
| 6  | Change Foundation                                            | <a href="https://changefoundation.ca/">https://changefoundation.ca/</a>                           |
| 7  | Ontario Caregiver Organization                               | <a href="https://ontariocaregiver.ca/">https://ontariocaregiver.ca/</a>                           |
| 8  | Canadian Association of Community Health Centres             | <a href="https://www.cachc.ca/">https://www.cachc.ca/</a>                                         |
| 9  | Coalition of Community Health and Resource Centres of Ottawa | <a href="http://www.coalitionottawa.ca/">http://www.coalitionottawa.ca/</a>                       |
| 10 | Canadian Red Cross                                           | <a href="https://www.redcross.ca/">https://www.redcross.ca/</a>                                   |
| 11 | Nourish                                                      | <a href="https://www.nourishleadership.ca/">https://www.nourishleadership.ca/</a>                 |

|    |                                                     |                                                                                         |
|----|-----------------------------------------------------|-----------------------------------------------------------------------------------------|
| 12 | McConnell Foundation                                | <a href="https://mcconnellfoundation.ca/">https://mcconnellfoundation.ca/</a>           |
| 13 | National Association of Community Health Centers    | <a href="https://www.nachc.org/">https://www.nachc.org/</a>                             |
| 14 | The British Academy                                 | <a href="https://www.thebritishacademy.ac.uk/">https://www.thebritishacademy.ac.uk/</a> |
| 15 | Healthcare Excellence Canada                        | <a href="https://www.healthcareexcellence.ca/">https://www.healthcareexcellence.ca/</a> |
| 16 | Centers for Disease Control and Prevention          | <a href="https://www.cdc.gov/">https://www.cdc.gov/</a>                                 |
| 17 | Agency for Healthcare Research and Quality (AHRQ)   | <a href="https://www.ahrq.gov">https://www.ahrq.gov</a>                                 |
| 18 | World Health Organization                           | <a href="https://www.who.int/">https://www.who.int/</a>                                 |
| 19 | National Collaborating Centre for Indigenous Health | <a href="https://www.nccih.ca/en/">https://www.nccih.ca/en/</a>                         |

Strategy 4: Contact knowledge experts

Procedure: contact content experts in the field who may be able to recommend specific documents relevant to the research question.

Knowledge Expert Documentation:

| # | Name              | Dates contacted        | # of items recommended | # of items identified for full screening (uploaded to citation management software) |
|---|-------------------|------------------------|------------------------|-------------------------------------------------------------------------------------|
| 1 | Dr. Kate Mulligan | 03-28-2022, 04-12-2022 | 16                     |                                                                                     |
